# Supplementary material for: Docosahexaenoic Acid Counteracts the Hypoxic-Induced Inflammatory and Metabolic Alterations in 3T3-L1 Adipocytes
Source: MDPI journal article supplement (doi:10.3390/nu14214600), 2022-11-01

**Manuscript title:**

**Docosahexaenoic acid Counteracts the Hypoxic-Induced Inflammatory and Metabolic Alterations in 3T3-L1 Adipocytes**

**Table S1. Description of media formulations for cell differentiation as provided by Zen-BIO**

| <b>MEDIUM</b>                 | <b>FORMULATION</b>                                                                                                                                                                                                     |
|-------------------------------|------------------------------------------------------------------------------------------------------------------------------------------------------------------------------------------------------------------------|
| 3T3-L1 Preadipocyte Medium    | DMEM, high glucose HEPES pH 7.4 Bovine Calf Serum (BCS)<br>Penicillin Streptomycin Amphotericin B                                                                                                                      |
| 3T3-L1 Adipocyte Medium       | DMEM / Ham's F-12 medium (1:1, v/v) HEPES pH 7.4 Fetal<br>Bovine Serum (FBS) Biotin Pantothenate Human insulin<br>Dexamethasone Penicillin Streptomycin Amphotericin B                                                 |
| 3T3-L1 Differentiation Medium | DMEM / Ham's F-12 medium (1:1, v/v) HEPES pH 7.4 Fetal<br>Bovine Serum (FBS) Biotin Pantothenate Human insulin<br>Dexamethasone Penicillin Streptomycin Amphotericin B<br>Isobutylmethylxanthine PPAR $\gamma$ agonist |

**Table S2. Primers**

|                                                                                                                                                                                                                                                                                   |
|-----------------------------------------------------------------------------------------------------------------------------------------------------------------------------------------------------------------------------------------------------------------------------------|
| TaqMan Gene Expression Assay (Mouse <b>PPAR<math>\gamma</math></b> primer): [Mm01184322_m1]/cat# 4331182/Applied Biosystems Foster, TheromFischer, USA                                                                                                                            |
| TaqMan Gene Expression Assay B-actin (Mouse <b>Actb</b> primer): (Mm00607939_s1)cat# 4331182/ Applied Biosystems Foster, TheromFischer, USA. Housekeeping gene.                                                                                                                   |
| TaqMan Gene Expression Assay <b>Slc1a3</b> (Mouse <b>GluT-1</b> primer): [Mm00600697_m1]/cat# 4331182/Applied Biosystems Foster, TheromFischer, USA                                                                                                                               |
| TaqMan Gene Expression Assay (Mouse <b>Hif1a</b> primer); [Mm00468869_m1]/cat# 4331182/ Applied Biosystems Foster, TheromFischer, USA                                                                                                                                             |
| TaqMan Gene Expression Assay (Mouse <b>FASN</b> - mouse primer): [Mm00662319_m1]/cat# 4331182/Applied Biosystems Foster, TheromFischer, USA                                                                                                                                       |
| PrimeTime Mini qPCR Assay, Mm.PT.58.13819524, <b>Hif-2 alpha</b><br>Probe 5'-/56-FAM/ACC AGA GCC /ZEN/GTT TTT GAG AGT CAG G/3IABkFQ/-3'<br>Primer1 5'-GAC ACG TCT TTG CTC TTC TTC-3.'<br>Primer2 5'-GAC TTC ACT CAT CCT TGC GA-3.'<br>IDT Integrated DNA Technologies USA         |
| PrimeTime Mini qPCR Assay, Mm.PT.58.9683859, <b>GLUT 4</b><br>Probe, 5'- /56-FAM/TGG AAA CCC /ZEN/GAC GGC ATC TTG T/3IABkFQ/-3'<br>Primer 1 5'-GAG AAT ACA GCT AGG ACC AGT G-3'<br>Primer 2, 5'-TCT TAT TGC AGC GCC TGA G-3.'<br>IDT Integrated DNA Technologies USA              |
| PrimeTime Mini qPCR Assay, Mm.PT.58.32860004, <b>ANT 2</b><br>PrimeTime Probe, 5'-/56-FAM/TCA CGG CAG /ZEN/ATA AGC AAT ACA AGG GC/3IABkFQ/-3.'<br>Primer1,5'-GAT ACG AAC CAC GCA GTC TAT G-3'<br>Primer 2,5'-GCA GCC ATC TCC AAG ACA G-3.'<br>IDT Integrated DNA Technologies USA |

Figure S1. Cell Line: ZenBIO 3T3-L1 Preadipocytes

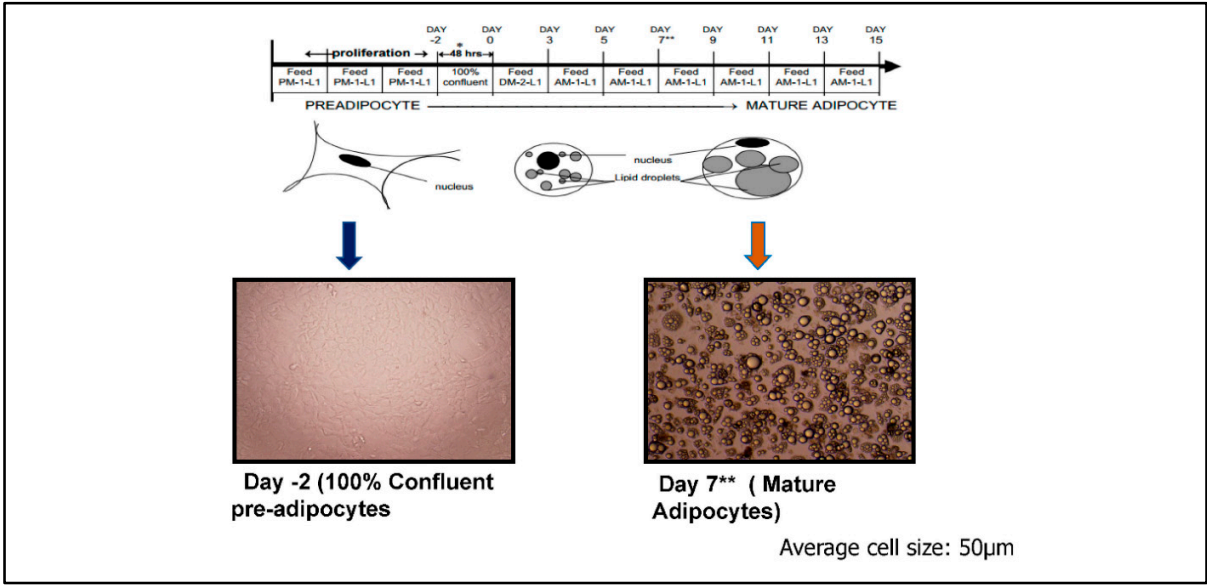

Supplement: s1 [file s1]
